# Supplementary material for: Selenosalicylate; a little-studied heavy-element analogue of the versatile thiosalicylate ligand
Source: Royal Society of Chemistry journal article supplement (doi:10.1039/d4ra00926f), 2024-01-01
Supplement: d4ra00926f1.pdf [file d4ra00926f1.pdf]

## **Selenosalicylate; a little-studied heavy-element analogue of the versatile thiosalicylate ligand**

Simeon Atiga,<sup>1,2,\*</sup> Graham C. Saunders<sup>1</sup> and William Henderson<sup>1</sup>

<sup>1</sup> *Chemistry, School of Science, University of Waikato, Private Bag 3105, Hamilton, New Zealand 3240*

<sup>2</sup> *Department of Chemistry, Faculty of Natural Sciences, Kogi State University, PMB 1008, Anyigba, Kogi State, Nigeria*

## Electronic Supplementary Information

### Contents

|                                                                                                                                                                                                                                                                                                                                                                                               |    |
|-----------------------------------------------------------------------------------------------------------------------------------------------------------------------------------------------------------------------------------------------------------------------------------------------------------------------------------------------------------------------------------------------|----|
| <b>Crystallographic parameters and data</b> .....                                                                                                                                                                                                                                                                                                                                             | 3  |
| <b>Table S1</b> Crystallographic data and structure refinement parameters of <b>4a</b> , <b>4h'</b> , <b>4k</b> and <b>4l<sup>†</sup></b> .....                                                                                                                                                                                                                                               | 4  |
| <b>Table S2</b> ESI MS data of selenosalicylic acid <b>2</b> and selenosalicylate complexes <b>4a - 4n</b> .....                                                                                                                                                                                                                                                                              | 5  |
| <b>Table S3</b> Selected infrared data (cm <sup>-1</sup> ) of selenosalicylic acid <b>2</b> and selenosalicylate complexes.....                                                                                                                                                                                                                                                               | 8  |
| <b>Table S4</b> Selected bond lengths (Å) and angles (°) of [ <i>p</i> -cym)Ru(SeC <sub>6</sub> H <sub>4</sub> CO <sub>2</sub> ) <sub>2</sub> ] <b>4h'</b> .....                                                                                                                                                                                                                              | 8  |
| <b>Table S5</b> Selected bond lengths (Å) and angles (°) of [Cp*Rh(SeC <sub>6</sub> H <sub>4</sub> CO <sub>2</sub> ) <sub>2</sub> ] <b>4l</b> .....                                                                                                                                                                                                                                           | 9  |
| <b>Table S6</b> Selected bond lengths (Å) and angles (°) of [Cp*Ir(SeC <sub>6</sub> H <sub>4</sub> CO <sub>2</sub> )(PPh <sub>3</sub> )] <b>4k</b> .....                                                                                                                                                                                                                                      | 9  |
| <b>Figure S1</b> Positive-ion ESI mass spectrum of [Ni(SeC <sub>6</sub> H <sub>4</sub> CO <sub>2</sub> )(dppe)] <b>4f</b> at a capillary exit voltage of 180 V, showing the absence of selenium loss. Insets (a) and (b) are the experimental and calculated isotope patterns of the [M + Na] <sup>+</sup> ion.....                                                                           | 10 |
| <b>Figure S2</b> Positive-ion ESI mass spectrum of [Cp*Rh(SeC <sub>6</sub> H <sub>4</sub> CO <sub>2</sub> )(PPh <sub>3</sub> )] <b>4j</b> at a CEV of 60 V showing the [M + H] <sup>+</sup> and [nM + Na] <sup>+</sup> (n = 1 - 3) ions along with their fragments. Insets (a) and (b) are the experimental and calculated isotope patterns of the [2M + H] <sup>+</sup> ion, <b>G</b> . .... | 11 |
| <b>Figure S3</b> <sup>1</sup> H NMR spectrum of selenosalicylic acid <b>2</b> in (CD <sub>3</sub> ) <sub>2</sub> SO.....                                                                                                                                                                                                                                                                      | 12 |
| <b>Figure S4</b> <sup>13</sup> C{ <sup>1</sup> H} NMR spectrum of selenosalicylic acid <b>2</b> in (CD <sub>3</sub> ) <sub>2</sub> SO.....                                                                                                                                                                                                                                                    | 12 |
| <b>Figure S5</b> <sup>31</sup> P{ <sup>1</sup> H} NMR spectrum of [Ni(SeC <sub>6</sub> H <sub>4</sub> CO <sub>2</sub> )(dppe)] <b>4f</b> in CDCl <sub>3</sub> ; the expansion in the centre is of the doublet centred around δ 57.4.....                                                                                                                                                      | 13 |
| <b>Scheme S1</b> Synthesis of the dinuclear complex [Pd(bipy)] <sub>2</sub> (Cl)(SeC <sub>6</sub> H <sub>4</sub> CO <sub>2</sub> )Cl <b>4g</b> .....                                                                                                                                                                                                                                          | 13 |
| <b>Scheme S2</b> Synthesis of mononuclear ruthenium, rhodium and iridium selenosalicylate complexes...14                                                                                                                                                                                                                                                                                      | 14 |
| <b>Scheme S3</b> Reaction scheme for the synthesis of the dinuclear complex <b>4l</b> .....                                                                                                                                                                                                                                                                                                   | 14 |
| <b>Scheme S4</b> Reaction scheme for the synthesis of the gold(III) selenosalicylate complex <b>4m</b> .....                                                                                                                                                                                                                                                                                  | 15 |

|                                                                                                                                                                                  |    |
|----------------------------------------------------------------------------------------------------------------------------------------------------------------------------------|----|
| <b>Scheme S5</b> Reaction scheme for the synthesis of the gold(I) selenosalicylate complex <b>4n</b> , and the proposed structure of the triply-aurated complex <b>4n'</b> ..... | 15 |
|----------------------------------------------------------------------------------------------------------------------------------------------------------------------------------|----|

### **Crystallographic parameters and data**

The crystallographic and refinement parameters are presented in Table S1. Molecular structure diagrams were generated using ORTEP-3<sup>i</sup> and Mercury.<sup>ii</sup> CCDC 2211290 – 2211293 contains the supplementary crystallographic data for these paper. These can be obtained free of charge from the Cambridge Crystallographic Data Centre via [www.ccdc.cam.ac.uk/structures](http://www.ccdc.cam.ac.uk/structures).

**Table S1** Crystallographic data and structure refinement parameters of **4a**, **4h'**, **4k** and **4l**<sup>†</sup>

| <b>Complex</b>                                             | <b>4a</b>                                                          | <b>4h'</b>                                                                     | <b>4l</b>                                                                      | <b>4k</b>                                                                                                       |
|------------------------------------------------------------|--------------------------------------------------------------------|--------------------------------------------------------------------------------|--------------------------------------------------------------------------------|-----------------------------------------------------------------------------------------------------------------|
| Formula                                                    | C <sub>43</sub> H <sub>34</sub> O <sub>2</sub> P <sub>2</sub> PtSe | C <sub>34</sub> H <sub>36</sub> O <sub>4</sub> Ru <sub>2</sub> Se <sub>2</sub> | C <sub>34</sub> H <sub>38</sub> O <sub>4</sub> Rh <sub>2</sub> Se <sub>2</sub> | C <sub>70</sub> H <sub>68</sub> Ir <sub>2</sub> O <sub>4</sub> P <sub>2</sub> Se <sub>2</sub> .H <sub>2</sub> O |
| Molecular weight                                           | 918.733                                                            | 868.711                                                                        | 874.408                                                                        | 788.820                                                                                                         |
| T (K)                                                      | 140.00(10)                                                         | 100.0(2)                                                                       | 140.00(10)                                                                     | 99.9(5)                                                                                                         |
| Crystal system                                             | monoclinic                                                         | monoclinic                                                                     | monoclinic                                                                     | triclinic                                                                                                       |
| Space group                                                | P2 <sub>1</sub> /n                                                 | P2 <sub>1</sub> /c                                                             | P2 <sub>1</sub> /n                                                             | P-1                                                                                                             |
| <i>a</i> , Å                                               | 11.47661(14)                                                       | 9.5935(3)                                                                      | 11.24520(15)                                                                   | 8.6583(3)                                                                                                       |
| <i>b</i> , Å                                               | 17.9492(2)                                                         | 12.8922(3)                                                                     | 10.02131(11)                                                                   | 18.2265(6)                                                                                                      |
| <i>c</i> , Å                                               | 17.0666(3)                                                         | 12.4357(5)                                                                     | 14.11953(18)                                                                   | 19.3876(6)                                                                                                      |
| $\alpha$ , °                                               | 90                                                                 | 90                                                                             | 90                                                                             | 86.012(3)                                                                                                       |
| $\beta$ , °                                                | 94.6401(10)                                                        | 106.070(3)                                                                     | 99.2080(13)                                                                    | 86.316(2)                                                                                                       |
| $\gamma$ , °                                               | 90                                                                 | 90                                                                             | 90                                                                             | 82.180(3)                                                                                                       |
| <i>V</i> , Å <sup>3</sup>                                  | 3515.09(8)                                                         | 1477.97(8)                                                                     | 1570.65(4)                                                                     | 3019.12(16)                                                                                                     |
| <i>Z</i>                                                   | 4                                                                  | 2                                                                              | 2                                                                              | 2                                                                                                               |
| D <sub>calc</sub> (g cm <sup>-3</sup> )                    | 1.737                                                              | 1.952                                                                          | 1.849                                                                          | 1.755                                                                                                           |
| Crystal size (mm <sup>3</sup> )                            | 0.183 × 0.125 × 0.102                                              | 0.123 × 0.092 × 0.07                                                           | 0.144 × 0.071 × 0.023                                                          | 0.26 × 0.113 × 0.027                                                                                            |
| $\mu$ (mm <sup>-1</sup> )                                  | 9.809                                                              | 11.408                                                                         | 11.446                                                                         | 10.693                                                                                                          |
| $\theta$ range (°)                                         | 3.57 - 73.98                                                       | 4.8 to 73.97                                                                   | 4.68 to 74.01                                                                  | 3.46 to 73.98                                                                                                   |
| Total reflections                                          | 20367                                                              | 8600                                                                           | 15243                                                                          | 33217                                                                                                           |
| Unique reflections (R <sub>int</sub> )                     | 6971(0.0269)                                                       | 2912 (0.0232)                                                                  | 3131 (0.0449)                                                                  | 11878 (0.0349)                                                                                                  |
| Observed reflections [ <i>I</i> > 2 $\sigma$ ( <i>I</i> )] | 6228                                                               | 2683                                                                           | 2842                                                                           | 10977                                                                                                           |
| Parameters                                                 | 468                                                                | 193                                                                            | 195                                                                            | 774                                                                                                             |
| Final indices [ <i>I</i> > 2 $\sigma$ ( <i>I</i> )]        | R <sub>1</sub> = 0.0237<br>wR <sub>2</sub> = 0.0548                | R <sub>1</sub> = 0.0245<br>wR <sub>2</sub> = 0.0611                            | R <sub>1</sub> = 0.0235<br>wR <sub>2</sub> = 0.0510                            | R <sub>1</sub> = 0.0323,<br>wR <sub>2</sub> = 0.0685                                                            |
| R indices (all data)                                       | R <sub>1</sub> = 0.0291<br>wR <sub>2</sub> = 0.0574                | R <sub>1</sub> = 0.0279<br>wR <sub>2</sub> = 0.0637                            | R <sub>1</sub> = 0.0305<br>wR <sub>2</sub> = 0.0532                            | R <sub>1</sub> = 0.0369,<br>wR <sub>2</sub> = 0.0710                                                            |
| Weighting scheme A, B <sup>‡</sup>                         | 0.025, 2.380                                                       | 0.030, 3.440                                                                   | 0.022, 1.020                                                                   | 0.000, 22.900                                                                                                   |
| Max., min. $\Delta\rho$ (e Å <sup>-3</sup> )               | 1.02, -0.78                                                        | 1.17, -0.91                                                                    | 0.71, -1.05                                                                    | 1.30, -1.28                                                                                                     |
| T <sub>max, min</sub>                                      | 1.000, 0.688                                                       | 0.959, 0.790                                                                   | 1.000, 0.724                                                                   | 1.000, 0.502                                                                                                    |
| Goodness of fit                                            | 1.046                                                              | 1.039                                                                          | 1.034                                                                          | 1.051                                                                                                           |

<sup>†</sup>estimated standard deviations are in parentheses. <sup>‡</sup>w = 1/[ $\sigma^2(F_o)^2 + \{A(F_o^2 + 2F_c^2)/3\}^2 + B(F_o^2 + 2F_c^2)/3$ ]

**Table S2** ESI MS data of selenosalicylic acid **2** and selenosalicylate complexes **4a - 4n**

| <b>Compound</b>                                                                                   | <b>Capillary Exit Voltage (CEV), V</b> | <b><i>m/z</i> (%), ions</b>                                                                                                                                                                                                                                                                                                                                                                                                                                                                                                                                                                                                                                                                                                                                                                                                                                                                                                                                              |
|---------------------------------------------------------------------------------------------------|----------------------------------------|--------------------------------------------------------------------------------------------------------------------------------------------------------------------------------------------------------------------------------------------------------------------------------------------------------------------------------------------------------------------------------------------------------------------------------------------------------------------------------------------------------------------------------------------------------------------------------------------------------------------------------------------------------------------------------------------------------------------------------------------------------------------------------------------------------------------------------------------------------------------------------------------------------------------------------------------------------------------------|
| HSeC <sub>6</sub> H <sub>4</sub> CO <sub>2</sub> H <b>2</b>                                       | 90                                     | 200.95 (100) [M – H] <sup>-</sup> , 156.96 (4) [M – H – CO <sub>2</sub> ] <sup>-</sup> , 400.87 (10) [(SeC <sub>6</sub> H <sub>4</sub> CO <sub>2</sub> H) <sub>2</sub> – H] <sup>-</sup>                                                                                                                                                                                                                                                                                                                                                                                                                                                                                                                                                                                                                                                                                                                                                                                 |
|                                                                                                   | 120                                    | 200.95 (100) [M – H] <sup>-</sup> , 156.96 (15) [M – H – CO <sub>2</sub> ] <sup>-</sup> , 400.87 (1) [(SeC <sub>6</sub> H <sub>4</sub> CO <sub>2</sub> H) <sub>2</sub> – H] <sup>-</sup>                                                                                                                                                                                                                                                                                                                                                                                                                                                                                                                                                                                                                                                                                                                                                                                 |
|                                                                                                   | 150                                    | 156.96 (100) [M – H – CO <sub>2</sub> ] <sup>-</sup> , 200.95 (96) [M – H] <sup>-</sup> , 400.87 (2) [(SeC <sub>6</sub> H <sub>4</sub> CO <sub>2</sub> H) <sub>2</sub> – H] <sup>-</sup>                                                                                                                                                                                                                                                                                                                                                                                                                                                                                                                                                                                                                                                                                                                                                                                 |
| [Pt(SeC <sub>6</sub> H <sub>4</sub> CO <sub>2</sub> )(PPh <sub>3</sub> ) <sub>2</sub> ] <b>4a</b> | 60                                     | 919.86 (3) [M + H] <sup>+</sup> , 941.76 (100) [M + Na] <sup>+</sup> , 1860.51 (96) [2M + Na] <sup>+</sup> , 2778.24 (3) [3M + Na] <sup>+</sup> , 1598.51 (8) [2M + Na – PPh <sub>3</sub> ] <sup>+</sup> , 2516.24 (2) [3M + Na – PPh <sub>3</sub> ] <sup>+</sup>                                                                                                                                                                                                                                                                                                                                                                                                                                                                                                                                                                                                                                                                                                        |
|                                                                                                   | 240                                    | 1860.51 (100) [2M + Na] <sup>+</sup> , 1598.51 (63) [2M + Na – PPh <sub>3</sub> ] <sup>+</sup> , 941.76 (24) [M + Na] <sup>+</sup> , 2778.24 (2) [3M + Na] <sup>+</sup> , 2516.24 (11) [3M + Na – PPh <sub>3</sub> ] <sup>+</sup> , 1518.76 (11) [2M + Na – PPh <sub>3</sub> – Se] <sup>+</sup> , 717.95 (10) [Pt(C <sub>6</sub> H <sub>4</sub> {PPh <sub>2</sub> })(PPh <sub>3</sub> )] <sup>+</sup> , 679.76 (12) [M + Na – PPh <sub>3</sub> ] <sup>+</sup> , 636.83 (12) [M + Na – PPh <sub>3</sub> – CO <sub>2</sub> ] <sup>+</sup> , 556.80 (4) ([M + Na – PPh <sub>3</sub> – CO <sub>2</sub> – Se] <sup>+</sup>                                                                                                                                                                                                                                                                                                                                                    |
| [Pd(SeC <sub>6</sub> H <sub>4</sub> CO <sub>2</sub> )(PPh <sub>3</sub> ) <sub>2</sub> ] <b>4b</b> | 90                                     | 831.09 (38) [M + H] <sup>+</sup> , 853.07 (100) [M + Na] <sup>+</sup> , 1683.06 (10) [2M + Na] <sup>+</sup> , 2513.63 (8) [3M + Na] <sup>+</sup> , 1420.99 (36) [2M + Na – PPh <sub>3</sub> ] <sup>+</sup> , 2250.93 (3) [3M + Na – PPh <sub>3</sub> ] <sup>+</sup> , 1987.89 (6) [3M + Na – 2PPh <sub>3</sub> ] <sup>+</sup> , 1136.52 (2) [2M – 2PPh <sub>3</sub> ] <sup>+</sup>                                                                                                                                                                                                                                                                                                                                                                                                                                                                                                                                                                                       |
|                                                                                                   | 150                                    | 831.09 (21) [M + H] <sup>+</sup> , 853.07 (76) [M + Na] <sup>+</sup> , 1683.06 (8) [2M + Na] <sup>+</sup> , 1420.99 (77) [2M + Na – PPh <sub>3</sub> ] <sup>+</sup> , 1399.98 (2) [2M + H – PPh <sub>3</sub> ] <sup>+</sup> , 1341.07 (4) [2M + Na – PPh <sub>3</sub> – Se] <sup>+</sup> , 1319.07 (2) [2M + H – PPh <sub>3</sub> – Se] <sup>+</sup> , 2250.93 (5) [3M + Na – PPh <sub>3</sub> ] <sup>+</sup> , 1987.89 (8) [3M + Na – 2PPh <sub>3</sub> ] <sup>+</sup> , 1725.80 (4) [3M + Na – 3PPh <sub>3</sub> ] <sup>+</sup> , 1908.48 (3) [3M + Na – 2PPh <sub>3</sub> – Se] <sup>+</sup> , 1158.89 (4) [2M + Na – 2PPh <sub>3</sub> ] <sup>+</sup> , 568.99 (32) [M + H – PPh <sub>3</sub> ] <sup>+</sup> , 590.97 (100) [M + Na – PPh <sub>3</sub> ] <sup>+</sup> , 511.05 (4) [M + Na – PPh <sub>3</sub> – Se] <sup>+</sup> , 546.98 (10) [M + Na – PPh <sub>3</sub> – CO <sub>2</sub> ] <sup>+</sup> , 896.82 (10) [2M + Na – 3PPh <sub>3</sub> ] <sup>+</sup> |
| [Pd(SeC <sub>6</sub> H <sub>4</sub> CO <sub>2</sub> )(dppe)] <b>4c</b>                            | 60                                     | 726.79 (100) [M + Na] <sup>+</sup> , 1430.60 (32) [2M + Na] <sup>+</sup> , 2134.38 (2) [3M + Na] <sup>+</sup> , 1244.71 (13) [{PdCl(SeC <sub>6</sub> H <sub>4</sub> CO <sub>2</sub> )(dppe)} <sub>2</sub> ] <sup>+</sup>                                                                                                                                                                                                                                                                                                                                                                                                                                                                                                                                                                                                                                                                                                                                                 |

|                                                                                                            |     |                                                                                                                                                                                                                                                                                                                                                                                                                                                  |
|------------------------------------------------------------------------------------------------------------|-----|--------------------------------------------------------------------------------------------------------------------------------------------------------------------------------------------------------------------------------------------------------------------------------------------------------------------------------------------------------------------------------------------------------------------------------------------------|
|                                                                                                            | 180 | 726.79 (100) [M + Na] <sup>+</sup> , 1430.60 (44) [2M + Na] <sup>+</sup> , 2134.38 (2) [3M + Na] <sup>+</sup> , 682.81 (60) [M + Na – CO <sub>2</sub> ] <sup>+</sup> , 1244.71 (9) [{Pd(dppe)} <sub>2</sub> (Cl)(SeC <sub>6</sub> H <sub>4</sub> CO <sub>2</sub> )] <sup>+</sup>                                                                                                                                                                 |
| [Pd(SeC <sub>6</sub> H <sub>4</sub> CO <sub>2</sub> )(phen)] <b>4d</b>                                     | 90  | 508.62 (51) [M + Na] <sup>+</sup> , 994.34 (86) [2M + Na] <sup>+</sup> , 1480.08 (100) [3M + Na] <sup>+</sup> , 1966.78 (11) [4M + Na] <sup>+</sup> , 2451.55 (2) [5M + Na] <sup>+</sup> , 1401.19 (13) [3M + Na – Se] <sup>+</sup> , 914.46 (10) [2M + Na – Se] <sup>+</sup> , 814.34 (10) [2M + Na – phen] <sup>+</sup>                                                                                                                        |
|                                                                                                            | 210 | 814.34 (100) [2M + Na – phen] <sup>+</sup> , 508.62 (32) [M + Na] <sup>+</sup> , 994.34 (40) [2M + Na] <sup>+</sup> , 1480.08 (21) [3M + Na] <sup>+</sup> , 1966.78 (3) [4M + Na] <sup>+</sup> , 464.64 (23) [M + Na – CO <sub>2</sub> ] <sup>+</sup> , 428.73 (27) [M + Na – Se] <sup>+</sup> , 1401.19 (2) [3M + Na – Se] <sup>+</sup> , 914.46 (8) [2M + Na – Se] <sup>+</sup> , 770.37 (26) [2M + Na – phen – CO <sub>2</sub> ] <sup>+</sup> |
| [Pd(SeC <sub>6</sub> H <sub>4</sub> CO <sub>2</sub> )(dppf)] <b>4e</b>                                     | 60  | 860.56 (9) [M + H] <sup>+</sup> , 882.53 (100) [M + Na] <sup>+</sup> , 1742.18 (52) [2M + Na] <sup>+</sup> , 2602.88 (2) [3M + Na] <sup>+</sup>                                                                                                                                                                                                                                                                                                  |
|                                                                                                            | 210 | 860.56 (4) [M + H] <sup>+</sup> , 882.53 (100) [M + Na] <sup>+</sup> , 1742.18 (44) [2M + Na] <sup>+</sup> , 838.53 (28) [M + Na – CO <sub>2</sub> ] <sup>+</sup>                                                                                                                                                                                                                                                                                |
| [Ni(SeC <sub>6</sub> H <sub>4</sub> CO <sub>2</sub> )(dppe)] <b>4f</b>                                     | 90  | 656.86 (8) [M + H] <sup>+</sup> , 678.90 (100) [M + Na] <sup>+</sup> , 1334.68 (45) [2M + Na] <sup>+</sup> , 1990.51 (3) [3M + Na] <sup>+</sup>                                                                                                                                                                                                                                                                                                  |
|                                                                                                            | 180 | 656.86 (13) [M + H] <sup>+</sup> , 678.90 (100) [M + Na] <sup>+</sup> , 1334.68 (60) [2M + Na] <sup>+</sup> , 1990.51 (2) [3M + Na] <sup>+</sup> , 634.85 (39) [M + Na – CO <sub>2</sub> ] <sup>+</sup>                                                                                                                                                                                                                                          |
| [{Pd(bipy)} <sub>2</sub> (Cl)(SeC <sub>6</sub> H <sub>4</sub> CO <sub>2</sub> )]Cl                         | 90  | 760.68 (100) [M] <sup>+</sup>                                                                                                                                                                                                                                                                                                                                                                                                                    |
| <b>4g</b>                                                                                                  | 150 | 760.68 (100) [M] <sup>+</sup> , 716.70 (12) [M – CO <sub>2</sub> ] <sup>+</sup>                                                                                                                                                                                                                                                                                                                                                                  |
| [( <i>p</i> -cym)Ru(SeC <sub>6</sub> H <sub>4</sub> CO <sub>2</sub> )(PPh <sub>3</sub> )]                  | 90  | 720.66 (100) [M + Na] <sup>+</sup> , 1416.43 (40) [2M + Na] <sup>+</sup> , 2114.19 (2) [3M + Na] <sup>+</sup> , 1587.22 (12) [3M + Na – 2PPh <sub>3</sub> ] <sup>+</sup> , 1154.42 (4) [2M + Na – PPh <sub>3</sub> ] <sup>+</sup> , 892.45 (6) [2M + Na – 2PPh <sub>3</sub> ] <sup>+</sup> , 458.67 (14) [M + Na – PPh <sub>3</sub> ] <sup>+</sup>                                                                                               |
| <b>4h</b>                                                                                                  | 120 | 720.66 (100) [M + Na] <sup>+</sup> , 1416.43 (54) [2M + Na] <sup>+</sup> , 2114.19 (4) [3M + Na] <sup>+</sup> , 1587.22 (19) [3M + Na – 2PPh <sub>3</sub> ] <sup>+</sup> , 1154.42 (17) [2M + Na – PPh <sub>3</sub> ] <sup>+</sup> , 892.45 (23) [2M + Na – 2PPh <sub>3</sub> ] <sup>+</sup> , 458.67 (82) [M + Na – PPh <sub>3</sub> ] <sup>+</sup>                                                                                             |
| [(C <sub>6</sub> Me <sub>6</sub> )Ru(SeC <sub>6</sub> H <sub>4</sub> CO <sub>2</sub> )(PPh <sub>3</sub> )] | 60  | 748.90 (11) [M + Na] <sup>+</sup> , 486.85 (6) [M + Na – PPh <sub>3</sub> ] <sup>+</sup> , 948.74 (100) [2M + Na – 2PPh <sub>3</sub> ] <sup>+</sup> , 1410.60 (3) [3M + Na – 3PPh <sub>3</sub> ] <sup>+</sup> , 1872.46 (31) [4M + Na – 4PPh <sub>3</sub> ] <sup>+</sup>                                                                                                                                                                         |
| <b>4i</b>                                                                                                  |     | 486.85 (66) [M + Na – PPh <sub>3</sub> ] <sup>+</sup> , 948.74 (100) [2M + Na – 2PPh <sub>3</sub> ] <sup>+</sup> , 1410.60 (3) [3M + Na – 3PPh <sub>3</sub> ] <sup>+</sup> , 1872.46 (24)                                                                                                                                                                                                                                                        |

|                                              |     |                                                                                                                                                                                                                                                                                                                                                                                                      |
|----------------------------------------------|-----|------------------------------------------------------------------------------------------------------------------------------------------------------------------------------------------------------------------------------------------------------------------------------------------------------------------------------------------------------------------------------------------------------|
|                                              | 210 | $[4M + Na - 4PPh_3]^+$ , 442.87 (19) $[M + Na - PPh_3 - CO_2]^+$                                                                                                                                                                                                                                                                                                                                     |
| $[Cp^*Rh(SeC_6H_4CO_2)(PPh_3)]$ <b>4j</b>    | 60  | 700.91 (24) $[M + H]^+$ , 722.90 (81) $[M + Na]^+$ , 1400.82 (13) $[2M + H]^+$ , 1422.81 (100) $[2M + Na]^+$ , 2120.70 (18) $[3M + Na]^+$ , 1858.66 (4) $[3M + Na - PPh_3]^+$ , 1596.63 (15) $[3M + Na - 2PPh_3]^+$ , 1081.24 (13) $[2M + Na - PPh_3 - Se]^+$ , 1000.92 (9) $[2M + Na - PPh_3 - 2Se]^+$ , 898.73 (8) $[2M + Na - 2PPh_3]^+$                                                          |
|                                              | 150 | 1400.82 (2) $[2M + H]^+$ , 1422.81 (48) $[M + Na]^+$ , 2120.70 (6) $[3M + Na]^+$ , 1858.66 (2) $[3M + Na - PPh_3]^+$ , 1596.63 (6) $[3M + Na - 2PPh_3]^+$ , 1081.24 (1) $[2M + Na - PPh_3 - Se]^+$ , 1000.92 (3) $[2M + Na - PPh_3 - 2Se]^+$ , 898.73 (51) $[2M + Na - 2PPh_3]^+$ , 460.86 (100) $[M + Na - PPh_3]^+$ , 416.89 (16) $[M + Na - PPh_3 - CO_2]^+$ , 1160.78 (33) $[2M + Na - PPh_3]^+$ |
| $[Cp^*Ir(SeC_6H_4CO_2)(PPh_3)]$ <b>4k</b>    | 60  | 791.19 (5) $[M + H]^+$ , 813 (92) $[M + Na]^+$ ; 1601.27 (100) $[2M + Na]^+$ , 2389.32 (11) $[3M + Na]^+$                                                                                                                                                                                                                                                                                            |
|                                              | 210 | 813 (26) $[M + Na]^+$ ; 1601.27 (78) $[M + Na]^+$ , 1339.18 (87) $[2M + Na - PPh_3]^+$ , 1077.10 (100) $[2M + Na - 2PPh_3]^+$ , 551.07 (86) $[M + Na - PPh_3]^+$ , 529.09 (16) $[M + H - PPh_3]^+$ , 507.08 (42) $[M + Na - PPh_3 - CO_2]^+$                                                                                                                                                         |
| $[ \{ Cp^*Rh(SeC_6H_4CO_2) \}_2 ]$ <b>4l</b> | 60  | 876.56 (6) $[M + H]^+$ , 898.70 (100) $[M + Na]^+$ , 1772.40 (51) $[2M + Na]^+$ , 1334.55 (4) $[2M + Na - Cp^*RhSeC_6H_4CO_2]^+$ , 460.36 (5) $[M + Na - Cp^*RhSeC_6H_4CO_2]^+$                                                                                                                                                                                                                      |
|                                              | 210 | 876.72 (2) $[M + H]^+$ , 854.72 (1) $[M + Na - CO_2]^+$ , 898.70 (100) $[M + Na]^+$ , 1772.40 (26) $[2M + Na]^+$ , 1334.55 (2) $[2M + Na - Cp^*RhSeC_6H_4CO_2]^+$ , 460.36 (61) $[M + Na - Cp^*RhSeC_6H_4CO_2]^+$ , 438.86 (7) $[M + H - Cp^*RhSeC_6H_4CO_2]^+$ , 416.85 (15) $[M + H - Cp^*RhSeC_6H_4CO_2 - CO_2]^+$                                                                                |
| $[(bp)Au(SeC_6H_4CO_2)]$ <b>4m</b>           | 90  | 587.86 (100) $[M + Na]^+$ , 1152.72 (49) $[2M + Na]^+$ , 1715.56 (34) $[3M + Na]^+$ , 2280.37 (3) $[4M + Na]^+$                                                                                                                                                                                                                                                                                      |
|                                              | 210 | 543.88 (12) $[M + Na - CO_2]^+$ , 587.86 (100) $[M + Na]^+$ , 1152.72 (36) $[2M + Na]^+$ , 1715.56 (2) $[3M + Na]^+$                                                                                                                                                                                                                                                                                 |
| $[(PPh_3Au)_2(SeC_6H_4CO_2)]$ <b>4n</b>      | 90  | 1118.62 (100) $[M + H]^+$ , 1140.59 (30) $[M + Na]^+$ , 1577.85 (8) $[M + Au(PPh_3)]^+$                                                                                                                                                                                                                                                                                                              |

**Table S3** Selected infrared data (cm<sup>-1</sup>) of selenosalicylic acid **2** and selenosalicylate complexes

| Compound | <b>2</b>  | <b>4a</b>    | <b>4b</b>    | <b>4c</b>    | <b>4d</b>    | <b>4e</b>    | <b>4f</b>    | <b>4g</b>    |
|----------|-----------|--------------|--------------|--------------|--------------|--------------|--------------|--------------|
| C=O      | 1672      | 1621<br>1583 | 1614<br>1594 | 1592<br>1582 | 1629<br>1582 | 1613<br>1592 | 1598<br>1582 | 1599<br>1573 |
| C–O      | 1264      | 1320         | 1330         | 1342         | 1383         | 1347         | 1335         | 1360         |
| C–Se     | 738       | 743          | 742          | 745          | 752          | 744          | 744          | 765          |
| Compound | <b>4h</b> | <b>4i</b>    | <b>4j</b>    | <b>4k</b>    | <b>4l</b>    | <b>4m</b>    | <b>4n</b>    |              |
| C=O      | 1591      | 1614<br>1602 | 1583<br>1566 | 1612<br>1592 | 1634<br>1588 | 1595<br>1579 | 1636<br>1583 |              |
| C–O      | 1345      | 1336         | 1358         | 1336         | 1353         | 1349         | 1383         |              |
| C–Se     | 745       | 750          | 744          | 744          | 765          | 754          | 744          |              |

**Table S4** Selected bond lengths (Å) and angles (°) of [*(p-cym)Ru(SeC<sub>6</sub>H<sub>4</sub>CO<sub>2</sub>)*]<sub>2</sub> **4h'**

|                   |           |                   |           |
|-------------------|-----------|-------------------|-----------|
| Ru1 - O1          | 2.099(2)  | Ru1 - Se1         | 2.5139(4) |
| Ru1 - Se1'        | 2.4862(4) | Se1 - C1          | 1.926     |
| O1 - C7           | 1.286(4)  | C7 - O2           | 1.226(4)  |
| C1 - C2           | 1.392(5)  | C2 - C3           | 1.397(5)  |
| C3 - C4           | 1.389(5)  | C4 - C5           | 1.382(6)  |
| C5 - C6           | 1.376(5)  | C6 - C1           | 1.400(4)  |
| Ru1 - C8          | 2.222(3)  | Ru1 - C9          | 2.201(3)  |
| Ru1 - C10         | 2.222(3)  | Ru1 - C11         | 2.152(3)  |
| Ru1 - C12         | 2.161(3)  | Ru1 - C13         | 2.252(3)  |
| Se1' - Ru1 - Se1  | 81.77(10) | O1 - Ru1 - Se1'   | 76.48(6)  |
| O1 - Ru1 - Se1    | 87.79(6)  | Ru1' - Se1 - Ru1  | 98.23(10) |
| Ru1 - Se1 - C1    | 111.08(9) | Ru1 - O1 - C7     | 135.7(2)  |
| Se1 - Ru1' - Se1' | 81.77(10) | Ru1 - Se1' - Ru1' | 98.23(10) |
| Se1 - Ru1' - O1'  | 76.48(6)  | Se1' - Ru1' - O1' | 87.78(6)  |
| Ru1' - Se1 - C1   | 101.28(9) | Se1 - C1 - C2     | 123.4(2)  |
| O1 - C7 - O2      | 122.4(3)  | O1 - C7 - C2      | 119.4(3)  |
| C1 - C2 - C7      | 124.5(3)  | O2 - C7 - C2      | 118.0(3)  |
| C2 - C3 - C4      | 121.2(3)  | C1 - C2 - C3      | 118.4(3)  |
| C4 - C5 - C6      | 120.4(3)  | C3 - C4 - C5      | 119.4(3)  |
| C6 - C1 - C2      | 120.3(3)  | C5 - C6 - C1      | 120.2(3)  |



**Table S5** Selected bond lengths (Å) and angles (°) of [ $\{\text{Cp}^*\text{Rh}(\text{SeC}_6\text{H}_4\text{CO}_2)\}_2$ ] **4l**

|                   |            |                   |            |
|-------------------|------------|-------------------|------------|
| Rh1 - O1          | 2.1000(18) | Rh1 - Se1'        | 2.4617(3)  |
| Rh1 - Se1         | 2.5060(3)  | Se1 - C1          | 1.923(3)   |
| O1 - C7           | 1.283(3)   | C7 - O2           | 1.231(3)   |
| C1 - C2           | 1.406(4)   | C2 - C3           | 1.395(4)   |
| C3 - C4           | 1.385(5)   | C4 - C5           | 1.388(5)   |
| C5 - C6           | 1.383(4)   | C6 - C1           | 1.393(4)   |
| Rh1 - C8          | 2.183(2)   | Rh1 - C9          | 2.157(3)   |
| Rh1 - C10         | 2.151(3)   | Rh1 - C11         | 2.164(3)   |
| Rh1 - C12         | 2.176(3)   | O1 - Rh1 - Se1'   | 75.76(5)   |
| Se1' - Rh1 - Se1  | 84.88(10)  | Rh1' - Se1 - Rh1  | 95.56(10)  |
| O1 - Rh1 - Se1    | 88.71(5)   | Rh1 - O1 - C7     | 134.89(18) |
| Rh1 - Se1 - C1    | 99.32(8)   | Rh1 - Se1' - Rh1' | 95.56(10)  |
| Se1 - Rh1' - Se1' | 84.88(10)  | Rh1' - Se1 - C1   | 115.43(8)  |
| Se1 - Rh1' - O1'  | 75.76(5)   | Se1' - Rh1' - O1' | 88.71(5)   |
| O1 - C7 - C2      | 120.7(2)   | Se1 - C1 - C2     | 125.4(2)   |
| O1 - C7 - O2      | 122.0(3)   | O2 - C7 - C2      | 117.3(2)   |
| C1 - C2 - C7      | 125.2(2)   | C1 - C2 - C3      | 117.9(3)   |
| C2 - C3 - C4      | 121.8(3)   | C3 - C4 - C5      | 120.0(3)   |
| C4 - C5 - C6      | 119.0(3)   | C5 - C6 - C1      | 121.5(3)   |
| C6 - C1 - C2      | 119.8(3)   |                   |            |

**Table S6** Selected bond lengths (Å) and angles (°) of [ $\text{Cp}^*\text{Ir}(\text{SeC}_6\text{H}_4\text{CO}_2)(\text{PPh}_3)$ ] **4k**

|                |            |                |           |
|----------------|------------|----------------|-----------|
| Ir1 - O1       | 2.110(3)   | Ir1 - Se1      | 2.4733(5) |
| Ir1 - P1       | 2.3058(11) | Se1 - C1       | 1.909(5)  |
| O1 - C7        | 1.280(6)   | C7 - O2        | 1.241(6)  |
| C1 - C2        | 1.406(7)   | C2 - C3        | 1.402(7)  |
| C3 - C4        | 1.384(8)   | C4 - C5        | 1.375(8)  |
| C5 - C6        | 1.389(7)   | C6 - C1        | 1.401(7)  |
| Ir1 - C8       | 2.244(5)   | Ir1 - C9       | 2.169(5)  |
| Ir1 - C10      | 2.223(4)   | Ir1 - C11      | 2.220(4)  |
| Ir1 - C12      | 2.230(4)   | O1 - Ir1 - P1  | 90.34(9)  |
| P1 - Ir1 - Se1 | 87.32(3)   | O1 - Ir1 - Se1 | 86.05(9)  |
| Ir1 - Se1 - C1 | 98.12(14)  | Ir1 - O1 - C7  | 131.3(3)  |
| Se1 - C1 - C2  | 124.8(4)   | O1 - C7 - C2   | 123.4(4)  |
| O2 - C7 - C2   | 116.9(5)   | O1 - C7 - O2   | 119.7(5)  |
| C1 - C2 - C7   | 125.3(4)   | C1 - C2 - C3   | 118.0(5)  |
| C2 - C3 - C4   | 121.6(5)   | C3 - C4 - C5   | 120.3(5)  |
| C4 - C5 - C6   | 119.3(5)   | C5 - C6 - C1   | 121.3(5)  |
| C6 - C1 - C2   | 119.4(5)   |                |           |

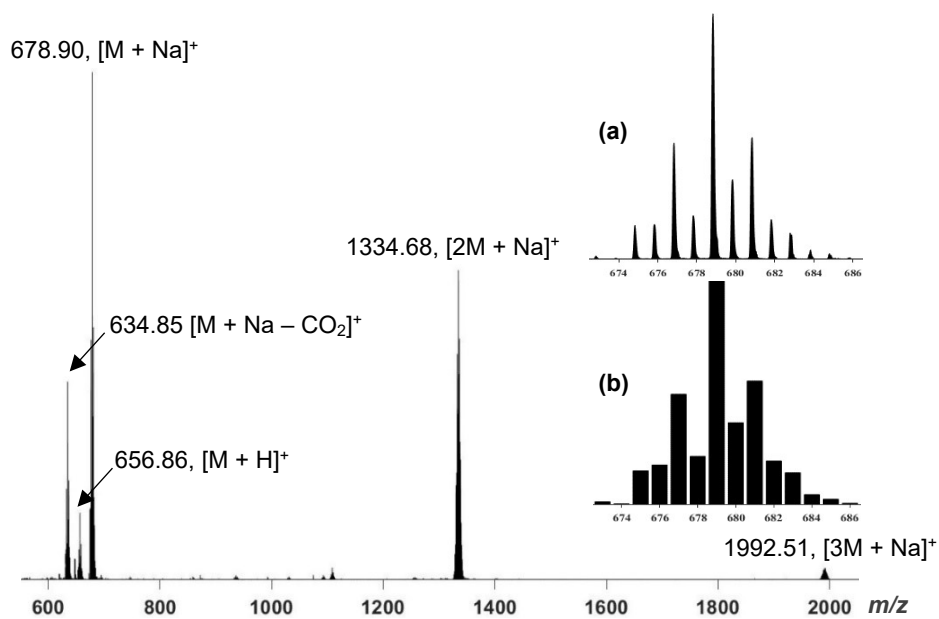

**Figure S1** Positive-ion ESI mass spectrum of  $[Ni(SeC_6H_4CO_2)(dppe)]$  **4f** at a capillary exit voltage of 180 V, showing the absence of selenium loss. Insets (a) and (b) are the experimental and calculated isotope patterns of the  $[M + Na]^+$  ion.

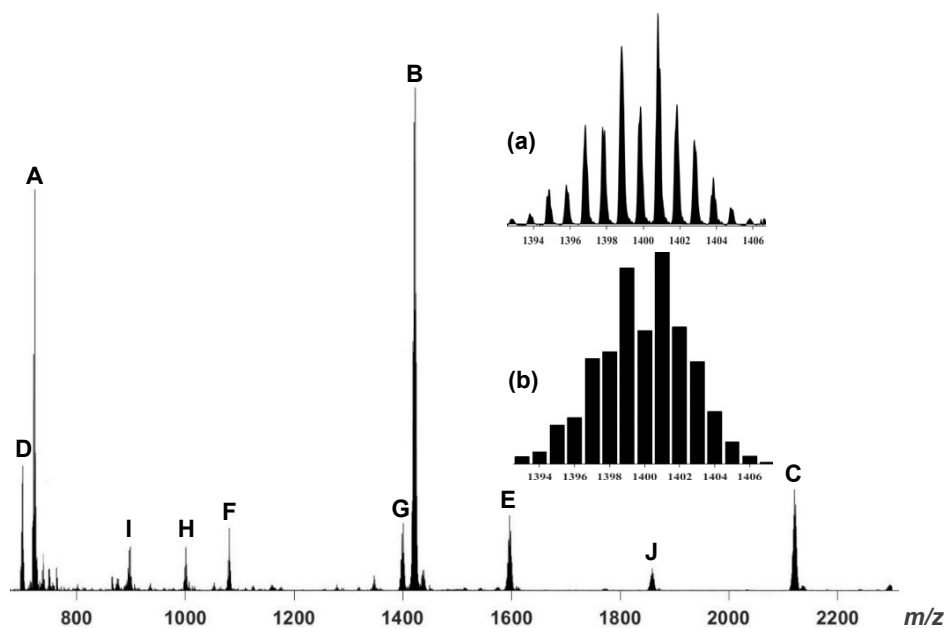

**Figure S2** Positive-ion ESI mass spectrum of  $[\text{Cp}^*\text{Rh}(\text{SeC}_6\text{H}_4\text{CO}_2)(\text{PPh}_3)]$  **4j** at a CEV of 60 V showing the  $[\text{M} + \text{H}]^+$  and  $[\text{nM} + \text{Na}]^+$  ( $\text{n} = 1 - 3$ ) ions along with their fragments. Insets **(a)** and **(b)** are the experimental and calculated isotope patterns of the  $[2\text{M} + \text{H}]^+$  ion, **G**.

**Legend:** **A** =  $[\text{M} + \text{Na}]^+$  ( $m/z = 722.90$ ); **B** =  $[2\text{M} + \text{Na}]^+$  ( $m/z = 1422.81$ ); **C** =  $[3\text{M} + \text{Na}]^+$  ( $m/z = 2120.70$ ); **D** =  $[\text{M} + \text{H}]^+$  ( $m/z = 700.91$ ); **E** =  $[3\text{M} + \text{Na} - 2\text{PPh}_3]^+$  ( $m/z = 1596.63$ ); **F** =  $[2\text{M} + \text{Na} - \text{PPh}_3 - \text{Se}]^+$  ( $m/z = 1081.24$ ); **G** =  $[2\text{M} + \text{H}]^+$  ( $m/z = 1400.82$ ); **H** =  $[2\text{M} + \text{Na} - \text{PPh}_3 - 2\text{Se}]^+$  ( $m/z = 1000.92$ ), **I** =  $[2\text{M} + \text{Na} - 2\text{PPh}_3]^+$  ( $m/z = 898.73$ ), **J** =  $[3\text{M} + \text{Na} - \text{PPh}_3]^+$  ( $m/z = 1858.66$ ).

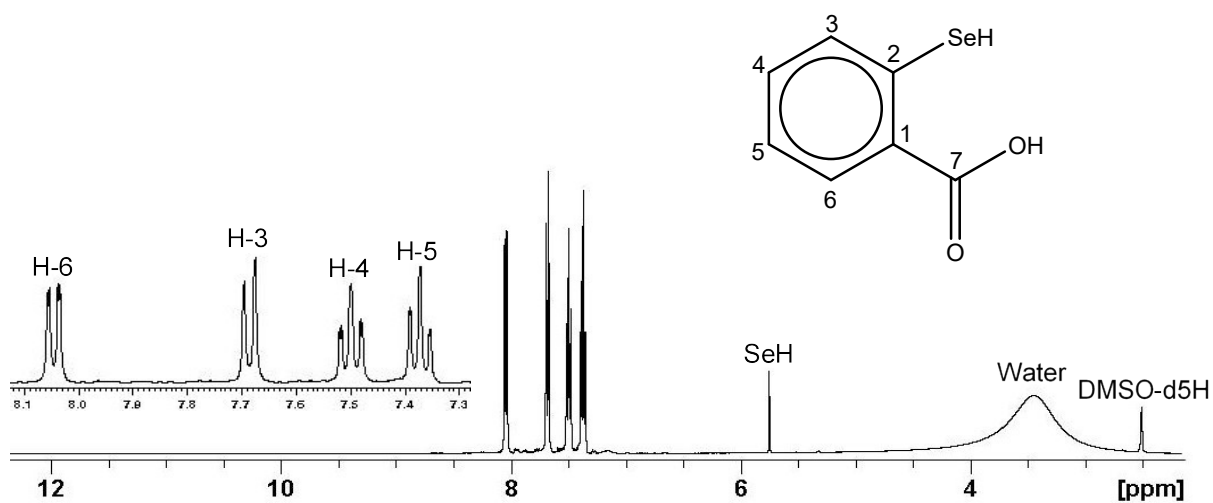

**Figure S3**  $^1\text{H}$  NMR spectrum of selenosalicylic acid **2** in  $(\text{CD}_3)_2\text{SO}$ .

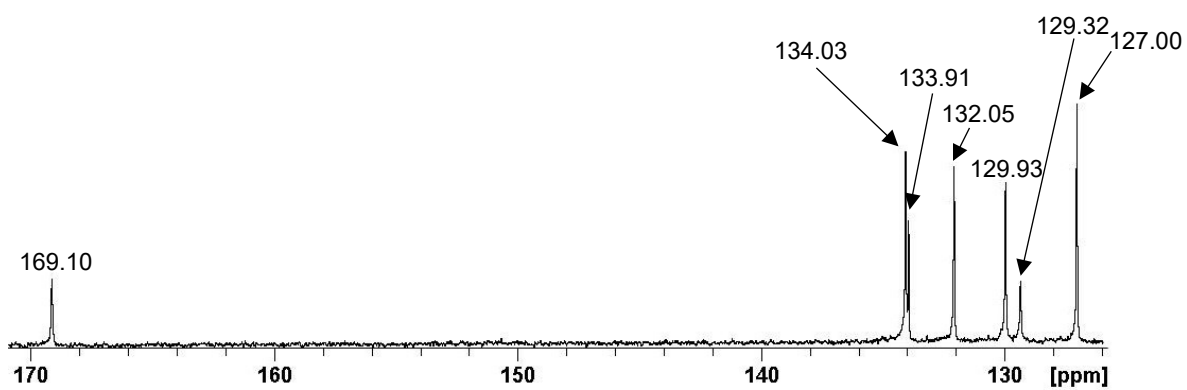

**Figure S4**  $^{13}\text{C}\{^1\text{H}\}$  NMR spectrum of selenosalicylic acid **2** in  $(\text{CD}_3)_2\text{SO}$ .

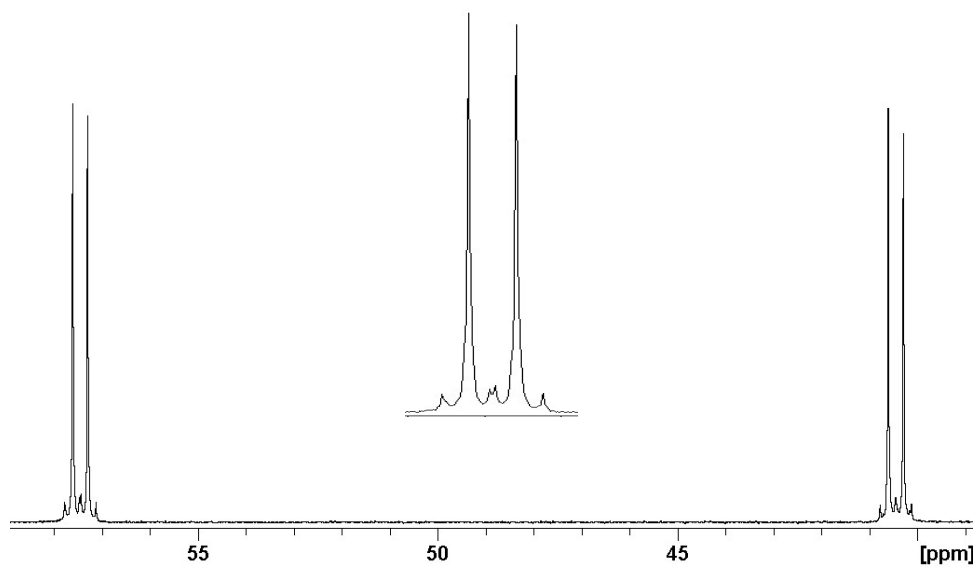

**Figure S5**  $^{31}\text{P}\{^1\text{H}\}$  NMR spectrum of  $[\text{Ni}(\text{SeC}_6\text{H}_4\text{CO}_2)(\text{dppe})]$  **4f** in  $\text{CDCl}_3$ ; the expansion in the centre is of the doublet centred around  $\delta$  57.4.

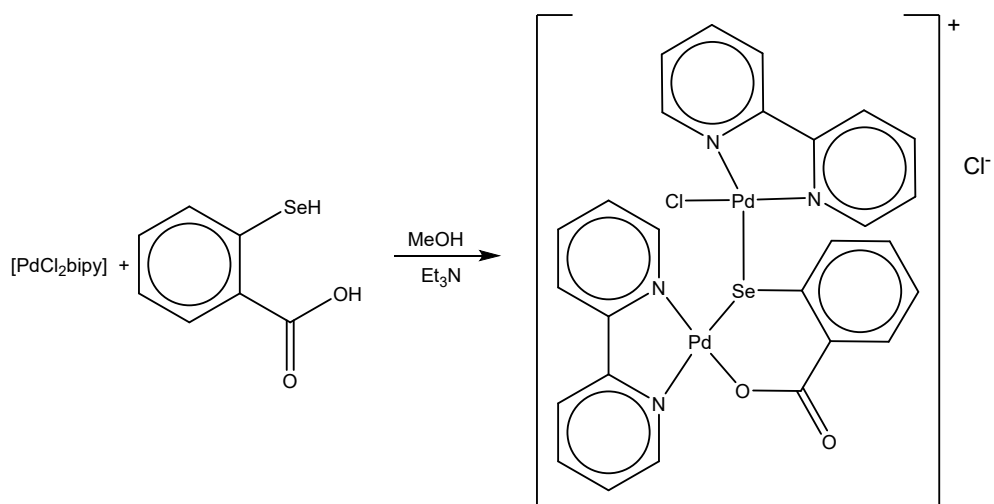

**Scheme S1** Synthesis of the dinuclear complex  $[\{\text{Pd}(\text{bipy})\}_2(\text{Cl})(\text{SeC}_6\text{H}_4\text{CO}_2)]\text{Cl}$  **4g**.

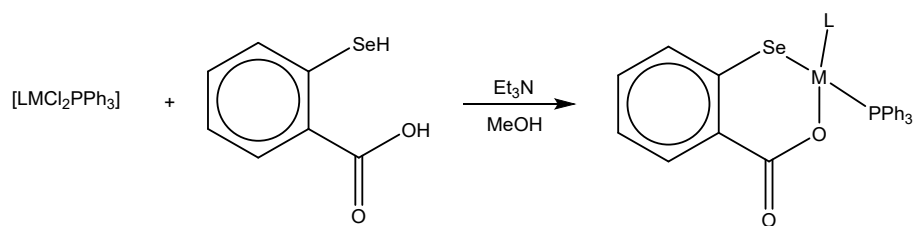

**4h:**  $M = Ru$ ;  $L = \eta^6\text{-}p\text{-cymene}$

**4i:**  $M = Ru$ ;  $L = \eta^6\text{-}C_6Me_6$

**4j:**  $M = Rh$ ;  $L = \eta^5\text{-}C_5Me_5$  ( $Cp^*$ )

**4k:**  $M = Ir$ ;  $L = Cp^*$

**Scheme S2** Synthesis of mononuclear ruthenium, rhodium and iridium selenosalicylate complexes.

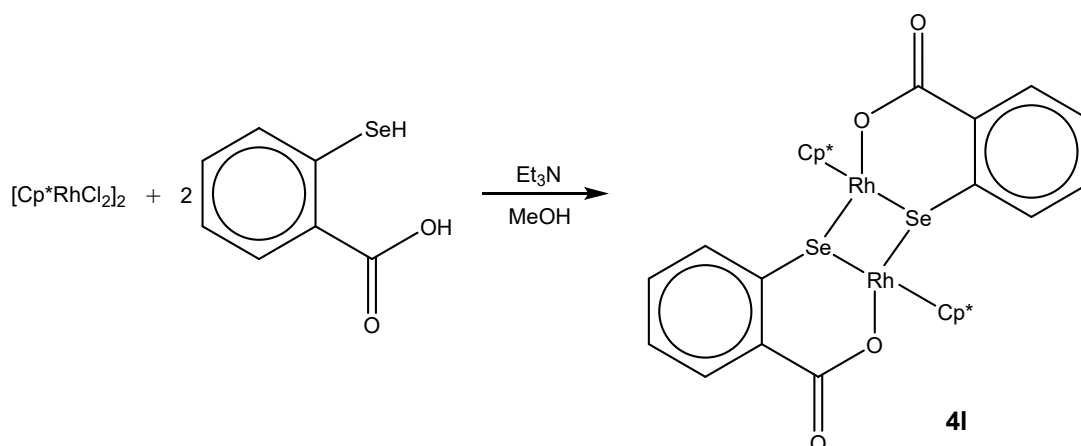

**Scheme S3** Reaction scheme for the synthesis of the dinuclear complex **4l**.

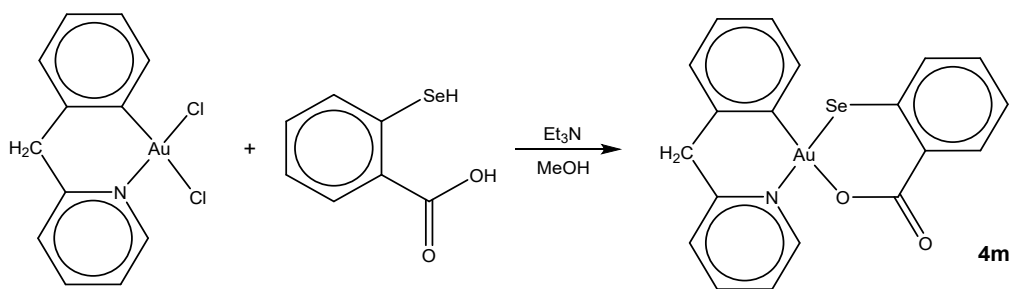

**Scheme S4** Reaction scheme for the synthesis of the gold(III) selenosalicylate complex **4m**.

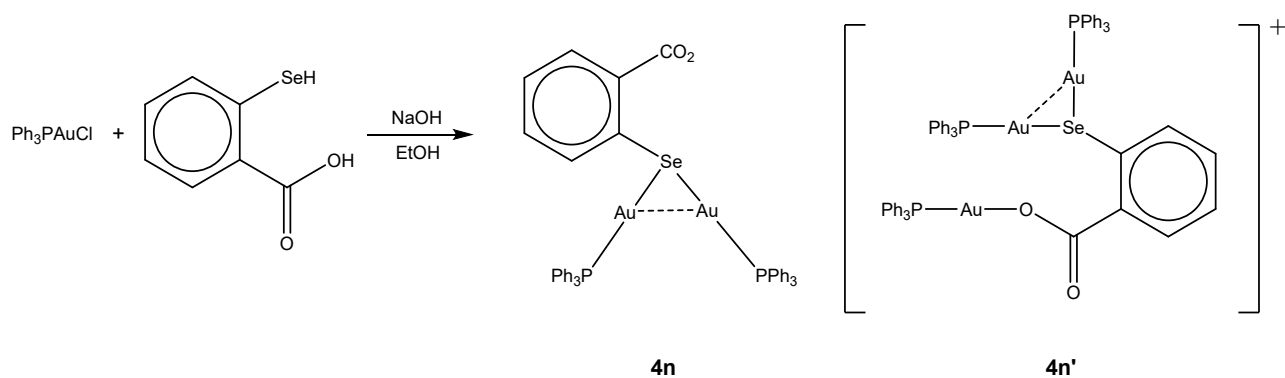

**Scheme S5** Reaction scheme for the synthesis of the gold(I) selenosalicylate complex **4n**, and the proposed structure of the triply-aurated complex **4n'**.

i L.J. Farrugia, *J. Appl. Crystallogr.*, 2012, **45**, 849-854.

ii C.F. Macrae, P.R. Edgington, P. McCabe, E. Pidcock, G.P. Shields, R. Taylor, M. Towler and J. Streek, *J. Appl. Crystallogr.*, 2006, **39**, 453-457.
